# Supplementary material for: Constructing ZIF-8 derived C–ZnS/ZnMoO4@MoS2 and C–ZnS/MoS2 nanocomposites using a simple one-pot strategy to enhance photocatalytic degradation activity
Source: Royal Society of Chemistry journal article supplement (doi:10.1039/c9ra06591a), 2019-01-01
Supplement: c9ra06591a1.pdf [file c9ra06591a1.pdf]

## Supporting information

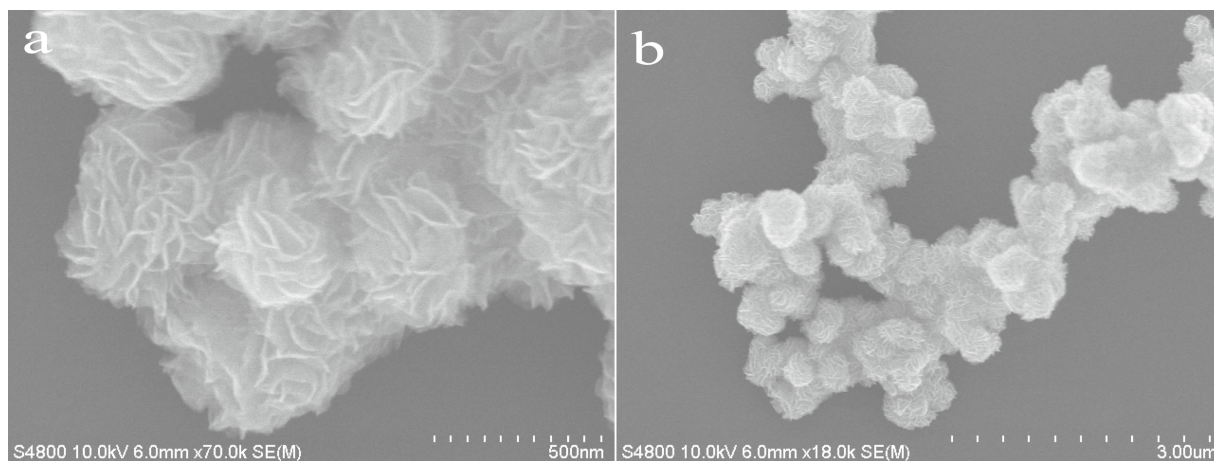

**FigS1.** SEM images of pure MoS<sub>2</sub> produced by thiourea and ammonium molybdate

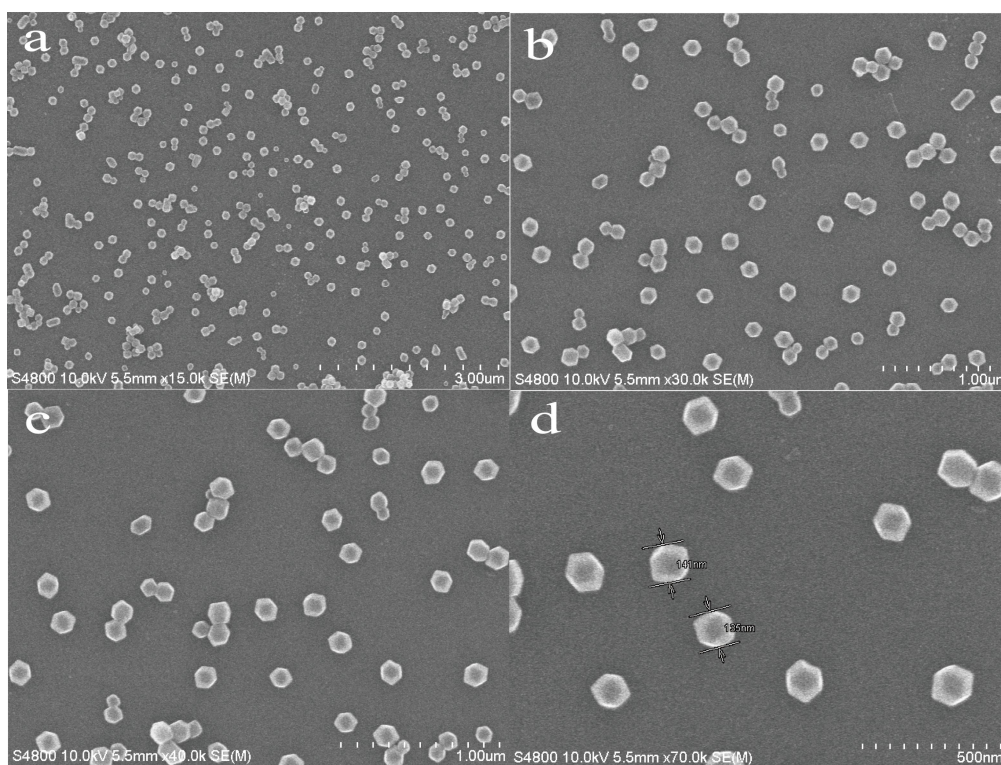

**FigS2.** SEM images of ZIF-8

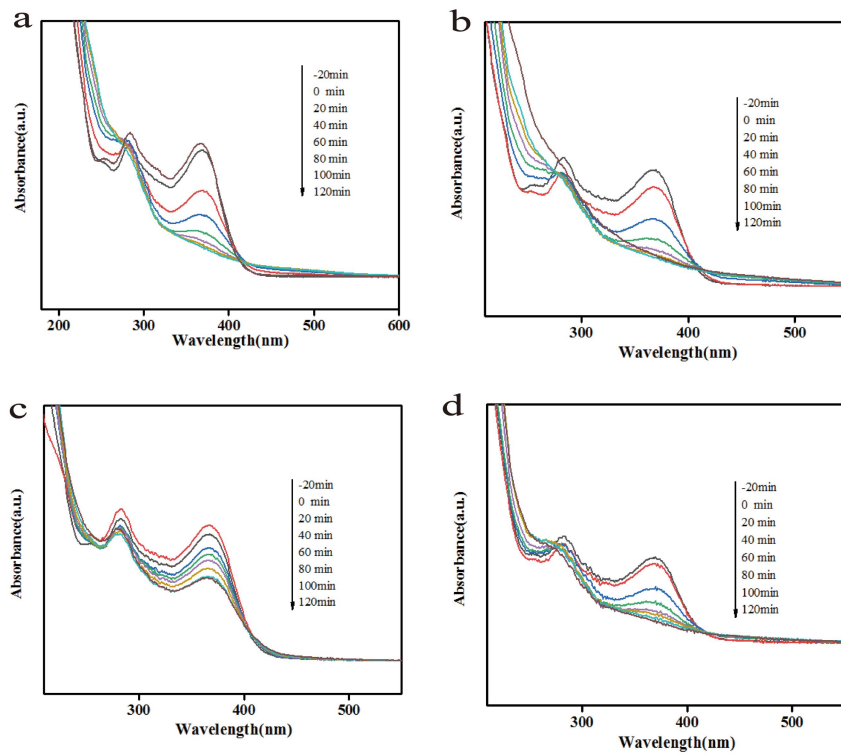

**FigS3.** Absorption spectra of TC-H solution collected during photodegradation of a)ZM1 b)ZM2 c)ZM3 d)ZM4
